# Supplementary material
Source: Springer Nature journal article supplement (https://www.springermedizin.de/resource/supplementary/12985_2010_951_MOESM5_ESM.pdf/9608810)

2000

1000

750

500

250

100

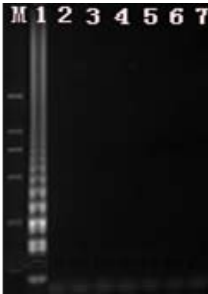

Supplement: MOESM5 [file 9608810]
